# Supplementary figures and images for: Determining the Rate of Drying Grain on the Rotary Dryer
Source: MDPI journal article supplement (doi:10.3390/insects13110997), 2011-01-01

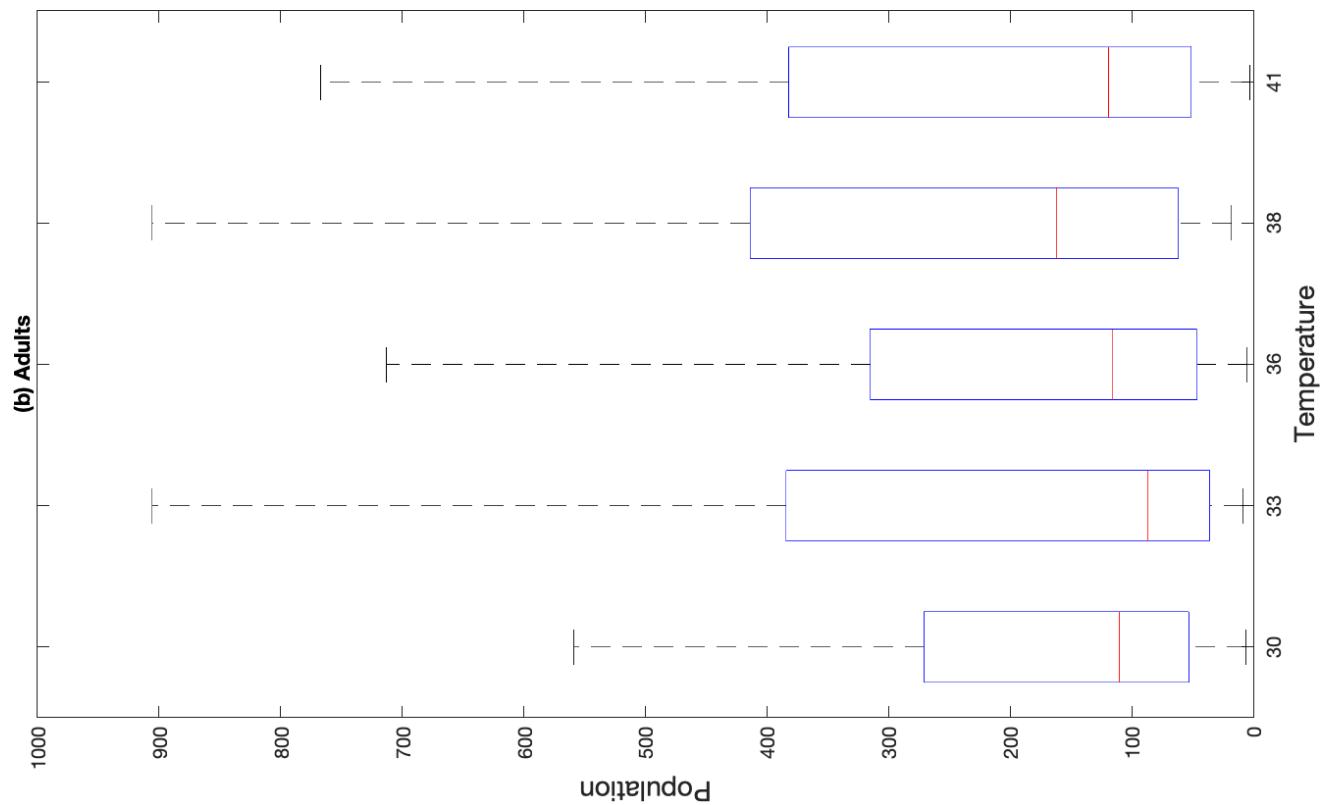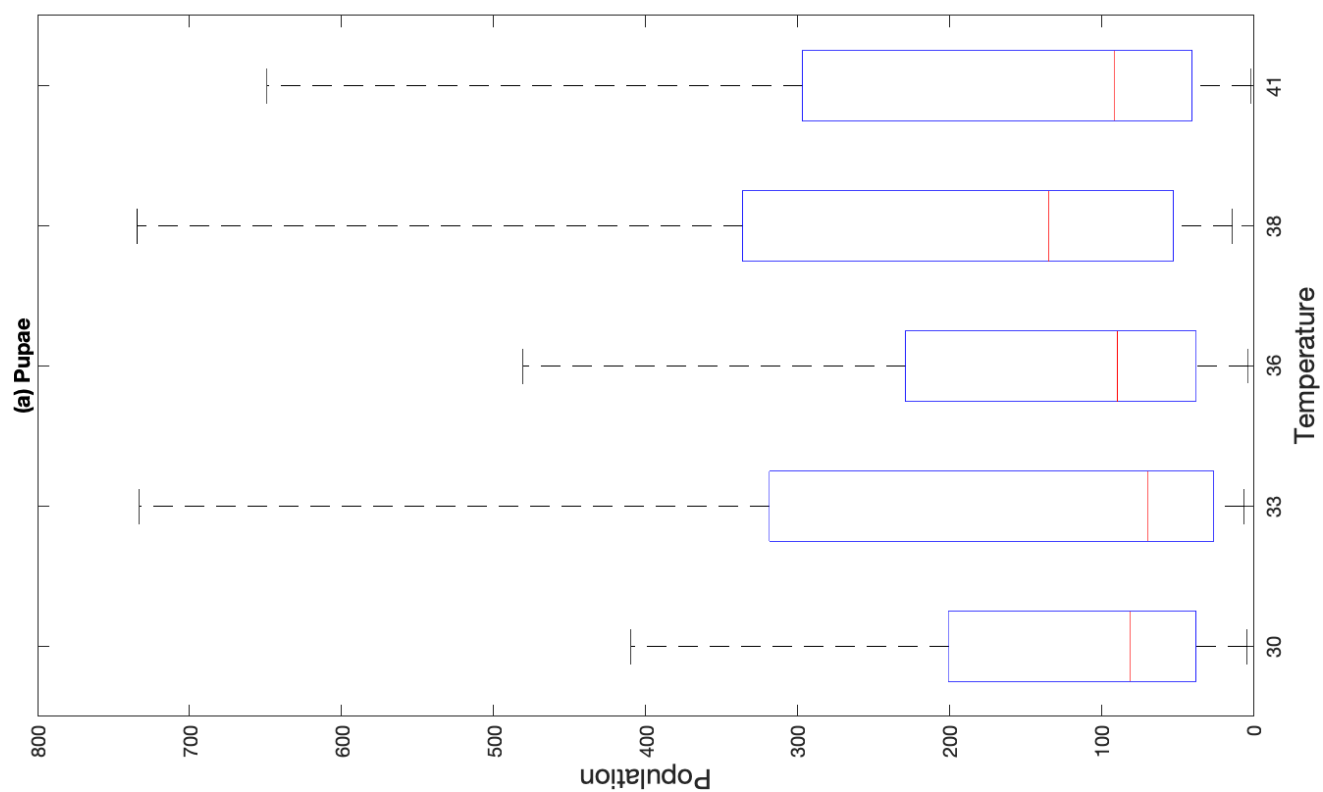

Figure S1. All temperatures values of consuming cool, warm, and hot blood.

Supplement: s1 [file s1]
